# Supplementary material for: Is NT-proBNP an early predictor of bronchopulmonary dysplasia? A competing risk analysis
Source: Research Square preprint supplement (doi:10.21203/rs.3.rs-7705741/v1), 2025-10-15
Supplement: Supplementary file 1 [file f7a9b3c859f86eb7008644fb.docx]

**SUPPLEMENTARY CONTENT**

**SUPPLEMENTARY TABLES**

**Supplementary Table S1: Univariate and multivariate competing risk regression models for successful extubation day 28.**

| **UNIVARIATE** | **SHR** | **95% CI** | **P** | **AIC** |
| --- | --- | --- | --- | --- |
| Log NT-proBNP | 0.69 | 0.64-0.74 | <0.001 | 2402 |
| GA | 1.3 | 1.21-1.4 | <0.001 | 2370 |
| CRIB 12 | 0.84 | 0.79-0.88 | <0.001 | 2412 |
| Late-onset sepsis | 0.57 | 0.44-0.744 | <0.001 | 2446 |
| HsPDA | 0.32 | 0.24-0.44 | <0.001 | 2410 |
| Treated hypotension1 | 0.34 | 0.24-0.48 | <0.001 | 2426 |
| Chorioamionitis | 0.57 | 0.38-0.85 | 0.006 | 2452 |
| **MULTIVARIATE**  **(GA adjusted)** | **SHR** | **95% CI** | **P** | **AIC** |
| Log NT-proBNP | 0.79 | 0.72-0.86 | <0.001 | 2372 |
| GA | 1.2 | 1.1-1.3 | <0.001 |  |
| **MULTIVARIATE**  **(best model)** | **SHR** | **95% CI** | **P** | **AIC** |
| Log NT-proBNP | 0.88 | 0.8-0.98 | 0.027 | 2354 |
| GA | 1.2 | 1.1-1.3 | <0.001 |
| HsPDA | 0.57 | 0.39-0.84 | 0.004 |
| Treated hypotension1 | 0.46 | 0.32-0.66 | <0.001 |

SHR, 95% CI, and AIC are presented. Both GA-adjusted and best-fitting multivariate models are shown. Abbreviations: SHR = subdistribution hazard ratio; CI = confidence interval; AIC = Akaike Information Criterion; GA = gestational age; CRIB = Clinical Risk Index for Babies; HsPDA = hemodynamically significant patent ductus arteriosus. 1Infants who required inotropes or vasopressors to treat hypotension during the first 3 days of life.

**Supplementary Table S2: Competing risk regression for moderate-to-severe bronchopulmonary dysplasia restricted to survivors beyond 14 days of life (n=248)**

| **UNIVARIATE** | **SHR** | **95% CI** | **P** | **AIC** |
| --- | --- | --- | --- | --- |
| Log(proBNP) | 1.08 | 0.81-1.4 | 0.600 | 262 |
| GA | 0.16 | 0.06-0.211 | <0.001 | 252 |
| IMV days | 0.98 | 0.96-1 | 0.100 | 262 |
| Chorioamnionitis | 2.9 | 1.2-7 | 0.020 | 258 |
| Late onset sepsis | 1.3 | 0.68-2.7 | 0.400 | 262 |
| CRIB 12 | 0.99 | 0.9-1.1 | 0.870 | 264 |
| HsPDA | 1.3 | 0.68-2.6 | 0.410 | 262 |
| **MULTIVARIATE (GA adjusted)** | **SHR** | **95% CI** | **P** | **AIC** |
| Log NTproBNP | 1.4 | 1.1-1.75 | 0.032 | 172 |
| EG | 0.18 | 0.15-0.3 | <0.001 |  |
| **MULTIVARIATE (best model)** | **SHR** | **95% CI** | **P** | **AIC** |
| Log NTproBNP | 1.3 | 1.01-1.73 | 0.042 | 171 |
| EG | 0.16 | 0.12-0.29 | <0.001 |  |
| Sepsis | 2.02 | 1.1-3.7 | 0.022 |  |

SHR, 95% CI, and AIC are presented. Both GA-adjusted and best-fitting multivariate models are shown. Abbreviations: SHR = subdistribution hazard ratio; CI = confidence interval; AIC = Akaike Information Criterion; GA = gestational age; CRIB = Clinical Risk Index for Babies; HsPDA = hemodynamically significant patent ductus arteriosus.

**Supplementary Table S3: Competing risk regression for death restricted to survivors beyond 14 days of life (n=248).**

| **UNIVARIATE** | **SHR** | **95% CI** | **P** | **AIC** |
| --- | --- | --- | --- | --- |
| Log NT-proBNP | 2.4 | 1.3-4.5 | <0.001 | 30 |
| GA | 0.37 | 0.21-0.64 | <0.001 | 24 |
| CRIB 12 | 1.32 | 1.02-1.7 | 0.035 | 31 |
| HsPDA* | - | - | - | - |
| Treated hypotension1 | 3.2 | 0.32-32 | 0.320 | 34 |
| **MULTIVARIATE**  (GA adjusted) | **SHR** | **95% CI** | **P** | **AIC** |
| Log NT-proBNP | 1.4 | 0.36-3.1 | 0.400 | 26 |
| GA | 0.41 | 0.24-0.72 | 0.002 |
| **MULTIVARIATE**  **(best model)** | **SHR** | **95% CI** | **P** | **AIC** |
| GA | 0.37 | 0.21-0.64 | <0.001 | 24 |

SHR, 95% CI, and AIC are displayed. Multivariate models include GA adjustment and the best-fitting model based on AIC. SHR = subdistribution hazard ratio; CI = confidence interval; AIC = Akaike Information Criterion; GA = gestational age; CRIB = Clinical Risk Index for Babies; HsPDA = hemodynamically significant patent ductus arteriosus. 1Infants who required inotropes or vasopressors to treat hypotension during the first 3 days of life. *Could not be estimated because all dead infants had HsPDA.

**SUPPLEMENTARY FIGURES**

**Supplementary figure S1: Cumulative incidence of successful extubation by log-transformed NT-proBNP tertiles**

**
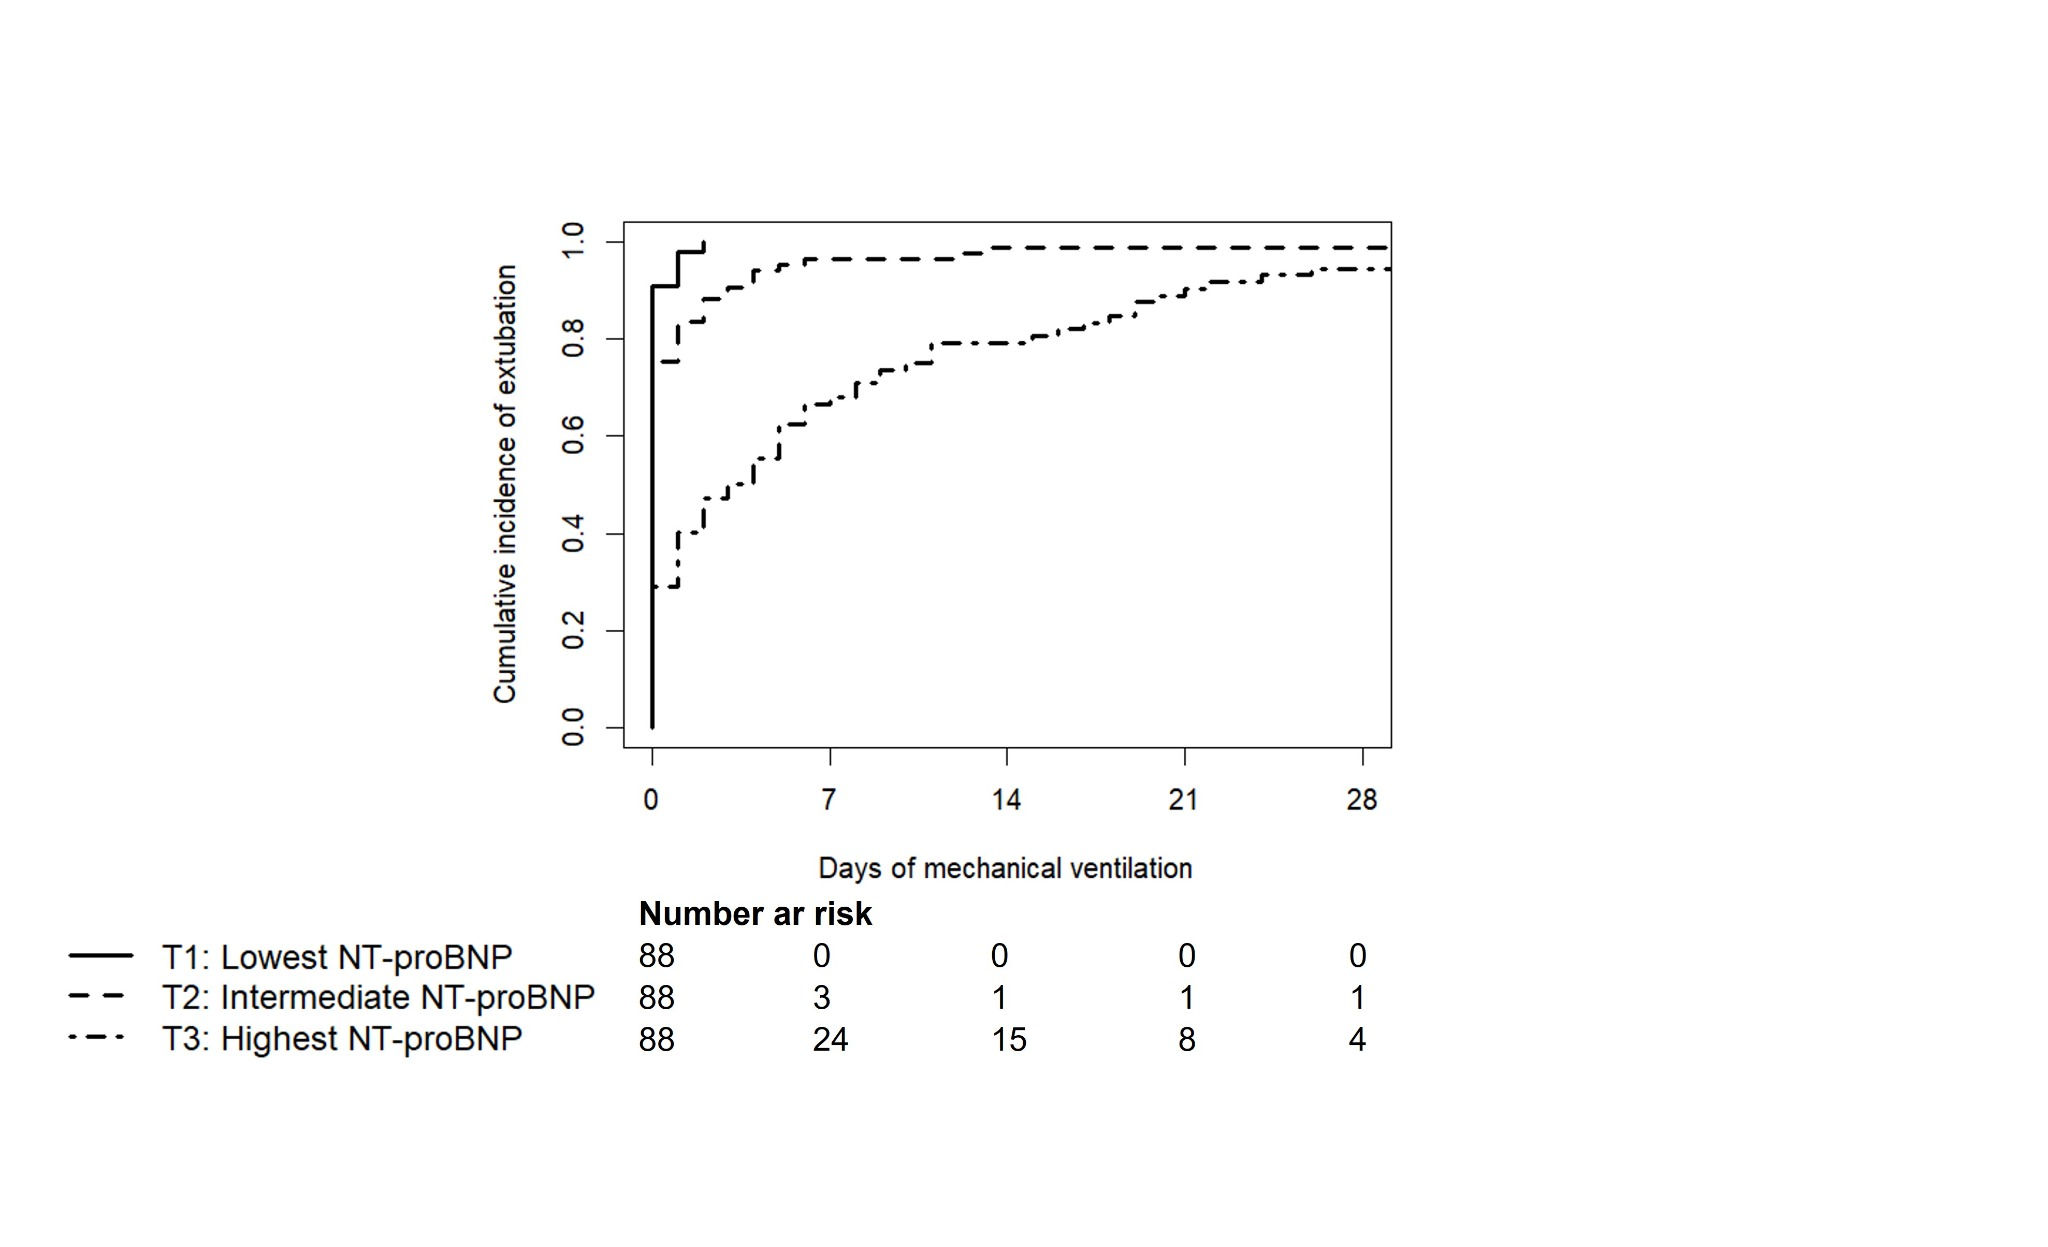
**

Differences among tertiles were assessed using Gray’s test (P<0.001)
Abbreviations: NT-proBNP = N-terminal pro-brain natriuretic peptide; msBPD = moderate-to-severe bronchopulmonary dysplasia; CIF = cumulative incidence function.

**Supplementary figure S2**

**Cumulative incidence of moderate-to-severe bronchopulmonary dysplasia (msBPD) by log-transformed NT-proBNP tertiles restricted to survivors beyond 14 days of life.**


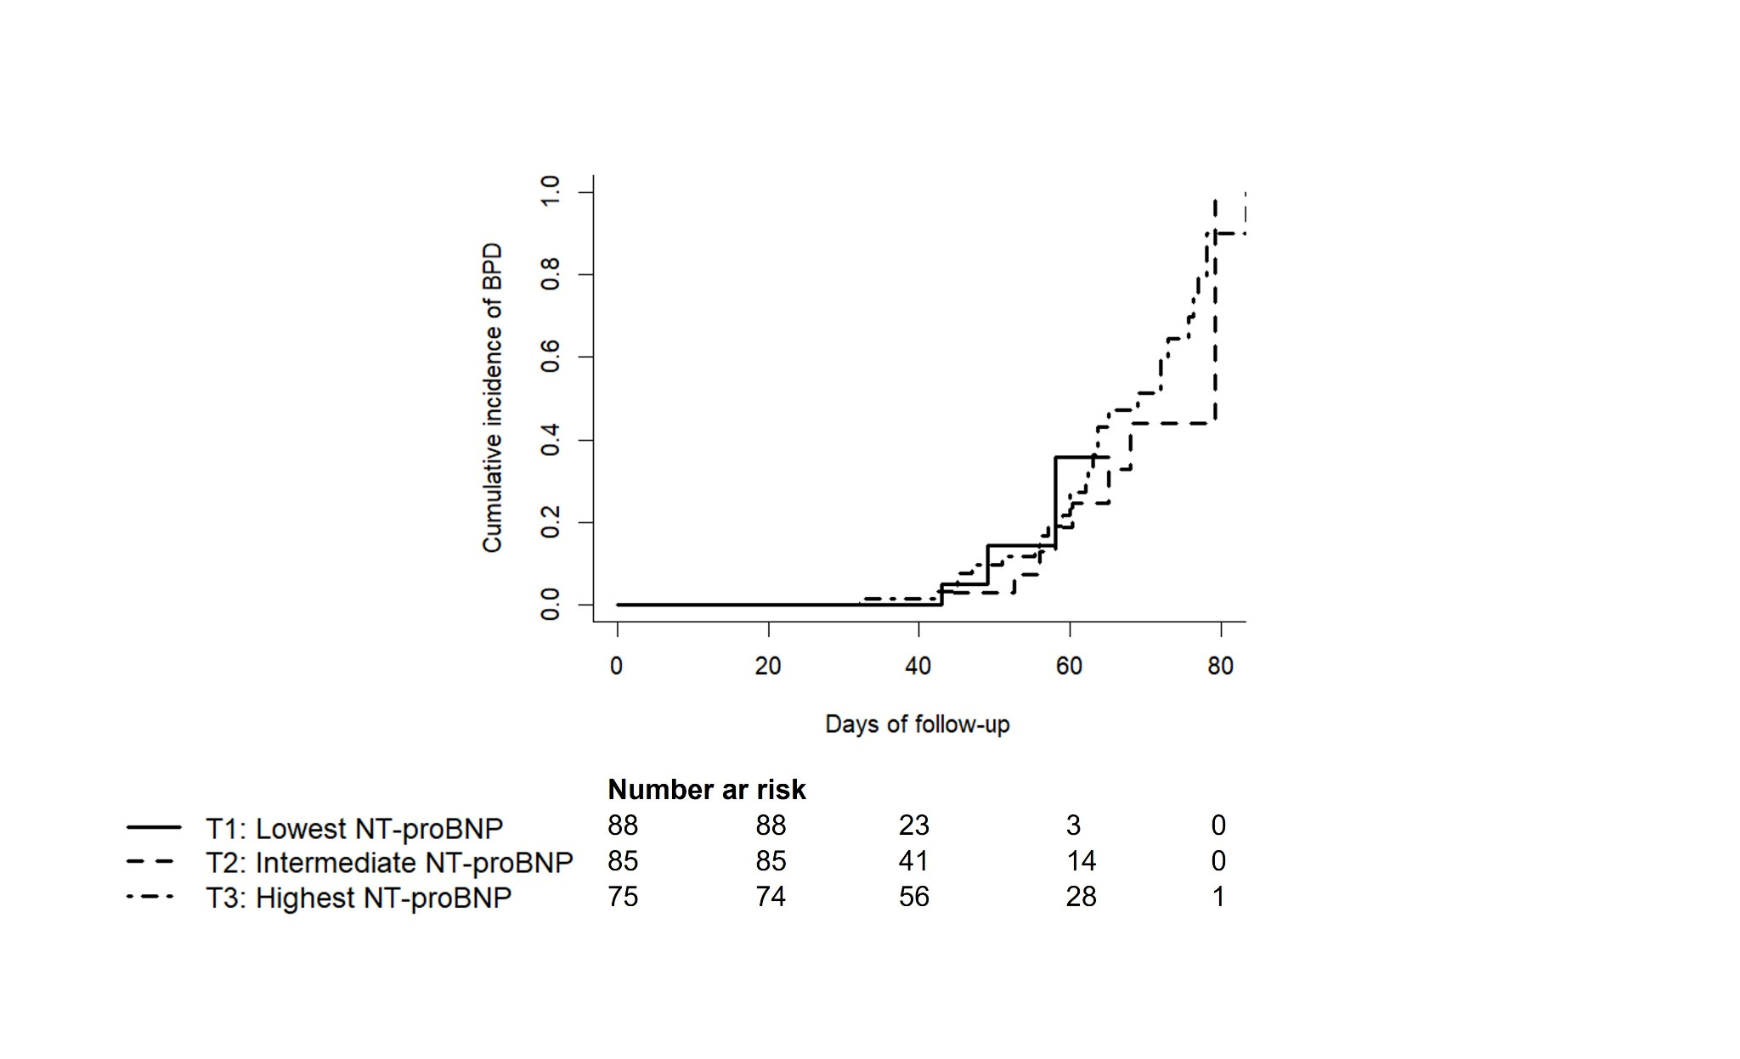


Differences among tertiles were assessed using Gray’s test (P=0.451)
Abbreviations: NT-proBNP = N-terminal pro-brain natriuretic peptide; msBPD = moderate-to-severe bronchopulmonary dysplasia; CIF = cumulative incidence function.

**Supplementary figure S3: Cumulative incidence of death before 36 weeks of postmenstrual age by log-transformed NT-proBNP tertiles restricted to survivors beyond 14 days of life.**


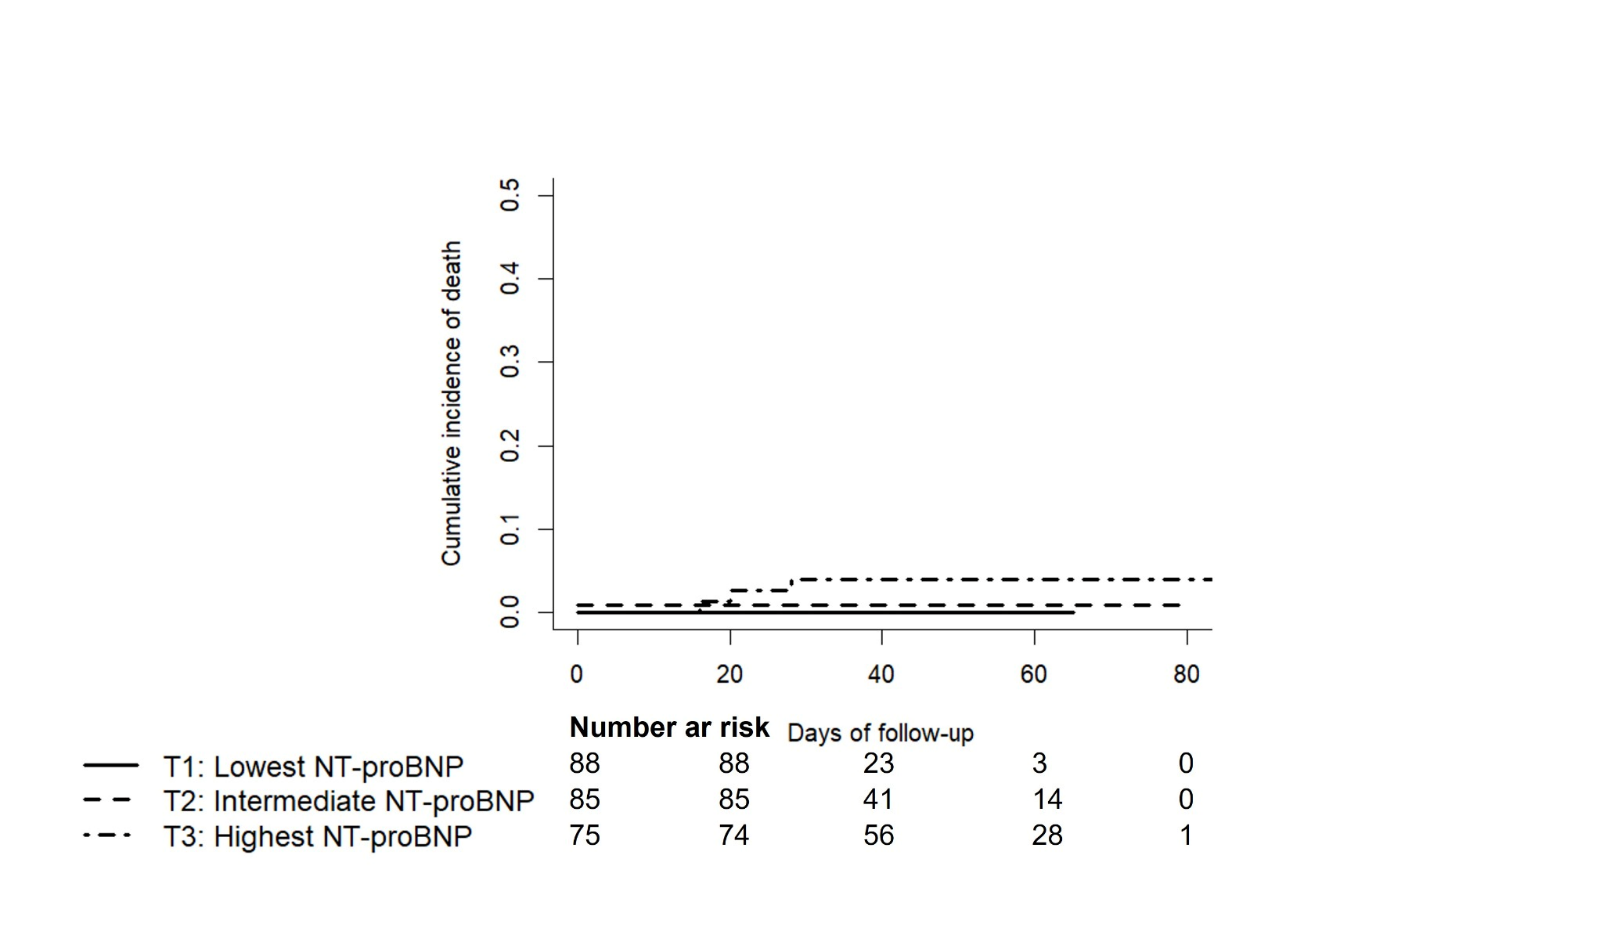


Differences among tertiles were assessed using Gray’s test (P=0.049)
Abbreviations: NT-proBNP = N-terminal pro-brain natriuretic peptide; msBPD = moderate-to-severe bronchopulmonary dysplasia; CIF = cumulative incidence function.
